# Supplementary material for: Comparative Microbiome Analysis of Three Species of Laboratory-Reared Periplaneta Cockroaches
Source: PubMed Central journal article supplement — Korean J Parasitol. 2020 Oct 22;58(5):537–42. doi: 10.3347/kjp.2020.58.5.537 (PMC7672242; doi:10.3347/kjp.2020.58.5.537), 2020-10-22
Supplement: kjp-58-5-537-suppl.pdf [file kjp-58-5-537-suppl.pdf]

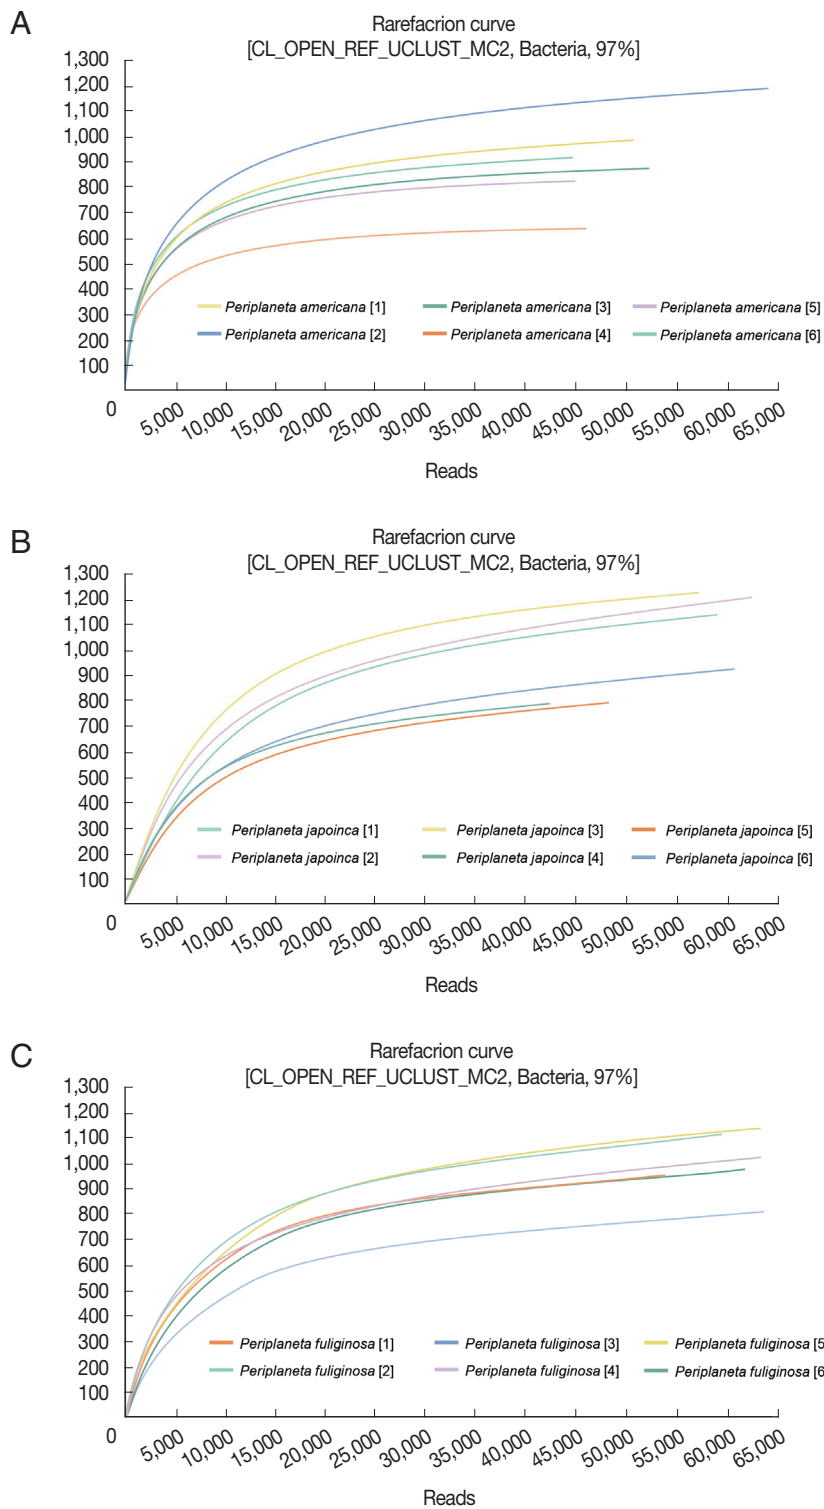

**Supplementary Fig. S1.** Rarefaction curves for the number of operational taxonomic units of the 3 cockroach species. (A) *Periplaneta americana*. (B) *Periplaneta japonica*. (C) *Periplaneta fuliginosa*.

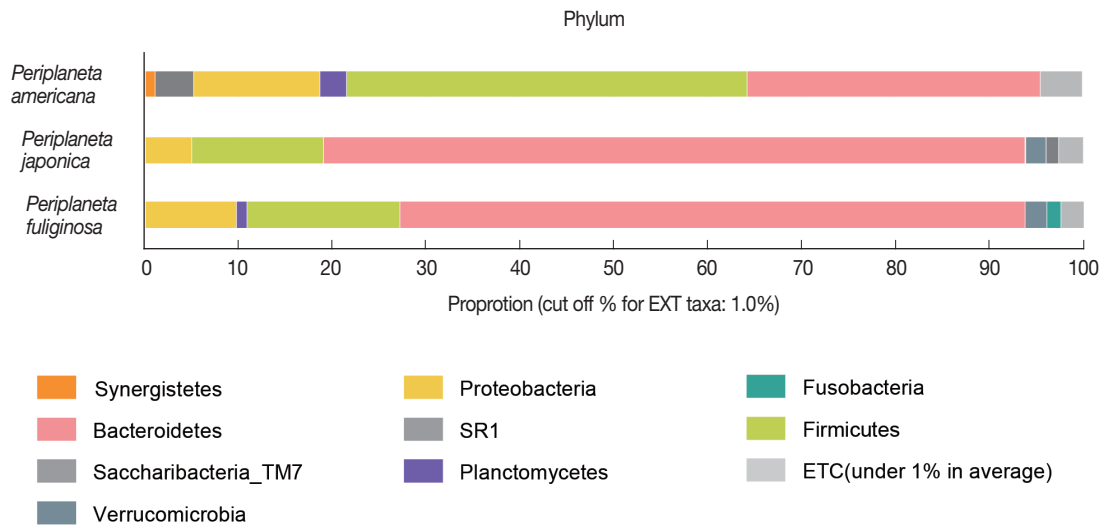

**Supplementary Fig. S2.** Distribution of bacterial taxa at the phylum level in samples from 3 cockroach species, *Periplaneta americana*, *Periplaneta japonica*, and *Periplaneta fuliginosa*. Each bar depicts the mean relative abundance value of an independent replicate. Bacterial phyla comprising more than 1% of the reads are shown. Each bar depicts the mean relative abundance value of an independent replicate (n=6 for each of the 3 species).
